# Supplementary material for: Thermally reduced pillared GO with precisely defined slit pore size
Source: Royal Society of Chemistry journal article supplement (doi:10.1039/d0ra00067a), 2020-01-01
Supplement: d0ra00067a1.pdf [file d0ra00067a1.pdf]

Supplementary Information

## Thermally reduced pillared GO with precisely defined slit pore size

Andreas Nordenström,<sup>a</sup> Artem Iakunkov,<sup>a</sup> Jinhua Sun<sup>a,b</sup> and Alexandr V. Talyzin<sup>\*a</sup>

### 1. Additional characterization of materials.

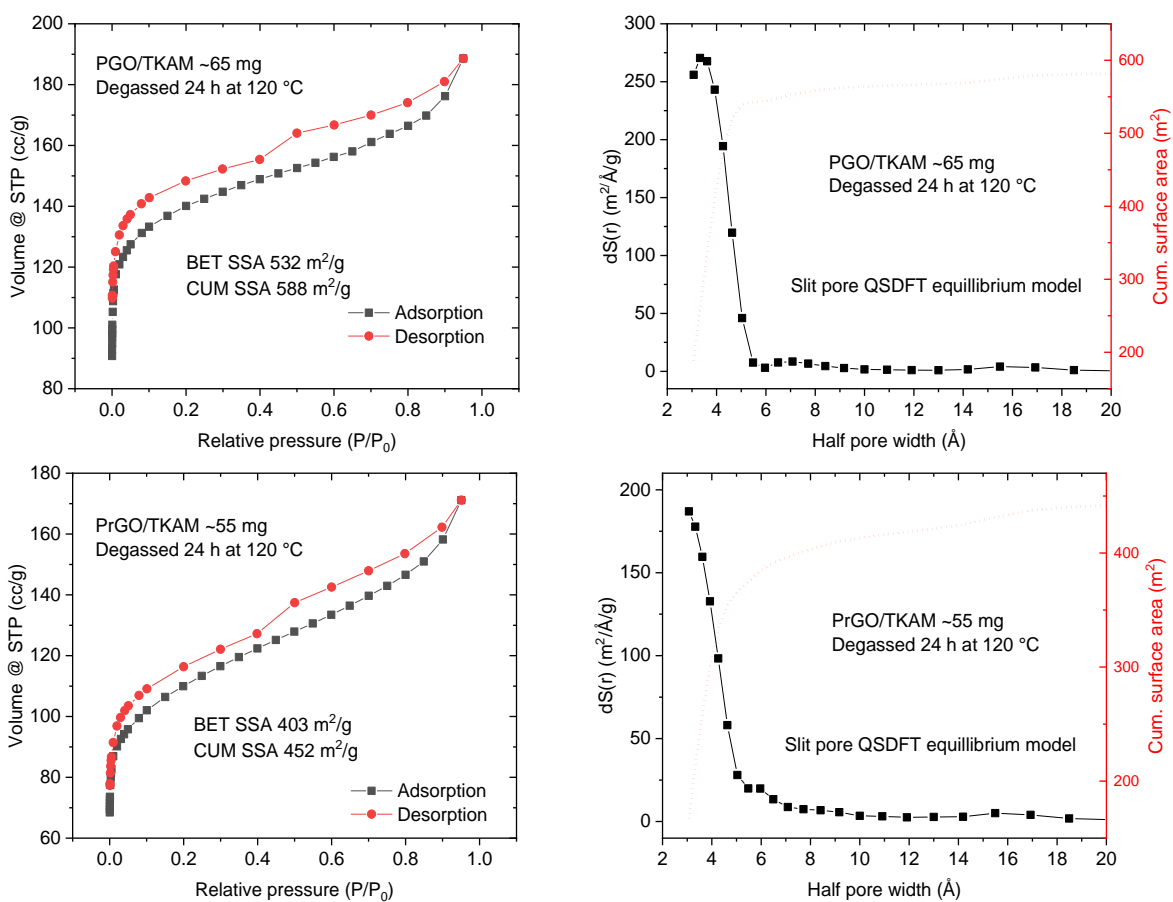

**Figure S1** Isotherms of PGO/TKAM and PrGO/TKAM for samples outgassed at 120 °C for 24 h

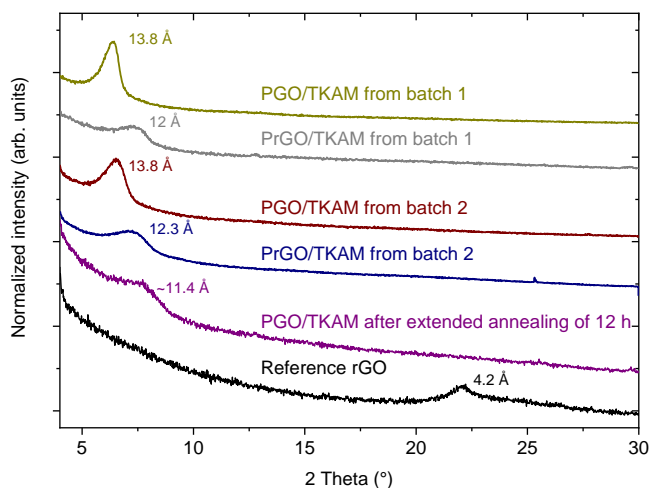

**Figure S2** XRD patterns recorded from two batches of PGO/TKAM and PrGO/TKAM, reference rGO and PGO/TKAM after 12 hours of annealing

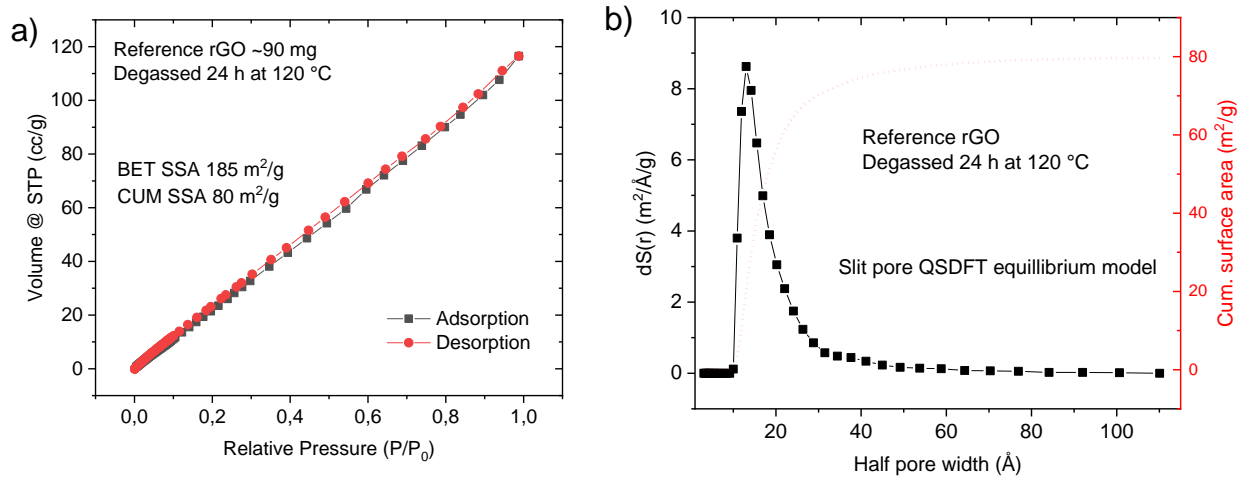

**Figure S3** Nitrogen sorption isotherm (a) and pore size distribution (b) for reference rGO

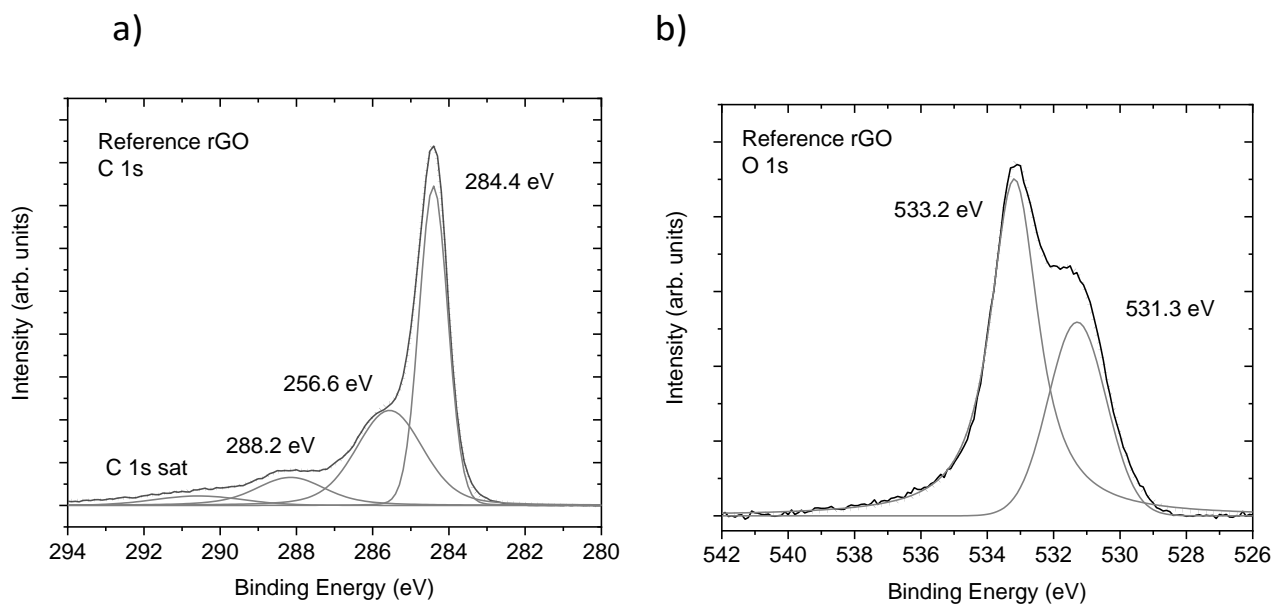

**Figure S4** XPS for reference rGO (C/O = 5.1 ): a) C1s and b) O1s

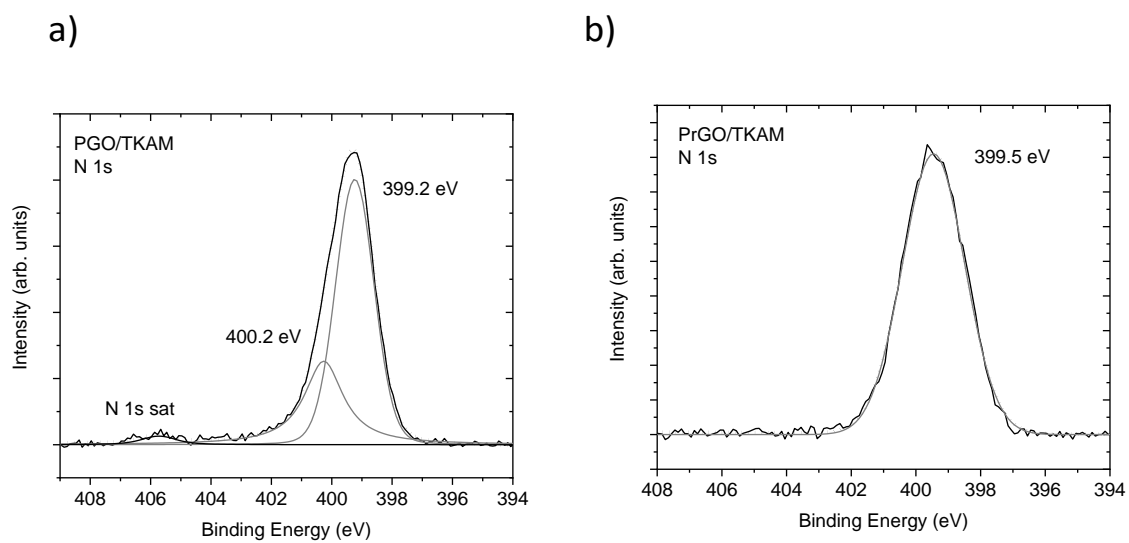

**Figure S5** XPS N 1s spectra for PGO/TKAM (a) and PrGO/TKAM (b)

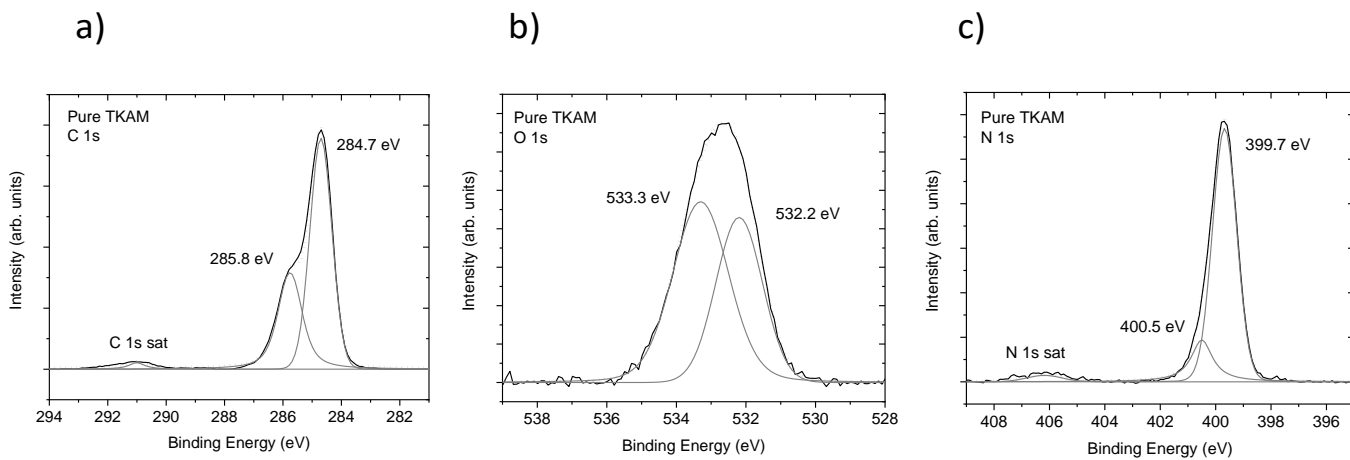

**Figure S6** XPS spectra of pure TKAM: ) a) C1s and b) O1s
